# Supplementary material
Source: PubMed Central journal article supplement (PMC6644227)
Supplement: ao6b00247_si_001.pdf [file ao6b00247_si_001.pdf]

# **Supporting Information for**

## **Using the Variable Nearest Neighbor Method to Identify P-Glycoprotein Substrates and Inhibitors**

*Patric Schyman<sup>1\*</sup>, Ruifeng Liu<sup>1</sup>, and Anders Wallqvist<sup>1\*</sup>*

<sup>1</sup>DoD Biotechnology High Performance Computing Software Applications Institute,  
Telemedicine and Advanced Technology Research Center, US Army Medical Research and  
Materiel Command, 2405 Whittier Drive, Frederick, MD 21702, USA

## Table of Contents

|                                                                                                                                                                                                                                      |     |
|--------------------------------------------------------------------------------------------------------------------------------------------------------------------------------------------------------------------------------------|-----|
| Table S1. Optimizing Tanimoto-Distance Threshold Value ( $d0$ ) Using 10-Fold Cross Validation for High Accuracy (HA) Parameters. Training Set for Pgp Substrates from Li et al. ( <i>Mol. Pharmaceutics</i> 2014, 11, 716-726)..... | S3  |
| Figure S1. Performance measures of the v-NN Pgp substrate model as a function of Tanimoto-distance threshold $d0$ at a constant smoothing factor $h$ of 0.6. ....                                                                    | S3  |
| Table S2. Optimizing the Smoothing Factor using 10-Fold Cross Validation for High Coverage (HC) Parameters. Training Set for Pgp Substrates from Li et al. ( <i>Mol. Pharmaceutics</i> 2014, 11, 716-726) ...                        | S4  |
| Figure S2. Performance measures of the v-NN Pgp substrate model as a function of smoothing factor $h$ at constant Tanimoto-distance threshold $d0$ of 1.0. ....                                                                      | S4  |
| Table S3. Optimizing the $d0$ Value using 10-Fold Cross Validation for High Coverage (HC) and High Accuracy (HA) Parameters. Training Set for Pgp inhibitors from Broccatelli et al. ( <i>J. Med Chem.</i> 2011, 54, 1740) .....     | S5  |
| Figure S3. Performance measures of the v-NN Pgp inhibitor model as a function of Tanimoto-distance threshold $d0$ at a constant smoothing factor $h$ of 0.6. ....                                                                    | S5  |
| Table S4. Optimizing the $d0$ Value using Leave-One-Out (LOO) Cross Validation for High Accuracy (HA) Parameters. Training Set for Pgp from Chen et al. ( <i>Mol. Pharmaceutics</i> 2011, 8, 889) .....                              | S6  |
| Figure S4. Performance measures of the v-NN Pgp inhibitor model as a function of Tanimoto-distance threshold $d0$ at a constant smoothing factor $h$ of 0.4. ....                                                                    | S6  |
| Table S5. Optimizing the Smoothing Factor Value using Leave-One-Out (LOO) Cross Validation for High Coverage (HC) Parameters. Training Set for Pgp from Chen et al. ( <i>Mol. Pharmaceutics</i> 2011, 8, 889) .                      | S7  |
| Figure S5. Performance measures of the v-NN Pgp inhibitor model as a function of smoothing factor $h$ at constant Tanimoto-distance threshold $d0$ of 1.0. ....                                                                      | S7  |
| Table S6. Optimizing the $d0$ Value using Leave-One-Out (LOO) Cross Validation for High Accuracy (HA) Parameters. Training Set for All Pgp Inhibitors.....                                                                           | S8  |
| Figure S6. Performance measures of the v-NN Pgp inhibitor model as a function of Tanimoto-distance threshold $d0$ at a constant smoothing factor $h$ of 0.3. ....                                                                    | S8  |
| Table S7. Optimizing the Smoothing Factor Value using Leave-One-Out (LOO) Cross Validation for High Coverage (HC) Parameters. Training Set All Pgp Inhibitors. ....                                                                  | S9  |
| Table S8. Performance Measures of the Pgp Substrate Model Using Different Fingerprints. ....                                                                                                                                         | S10 |
| Table S9. Performance Measures of the Pgp Inhibitor Model Using Different Fingerprints.....                                                                                                                                          | S11 |

**Table S1. Optimizing Tanimoto-Distance Threshold Value ( $d_0$ ) Using 10-Fold Cross Validation for High Accuracy (HA) Parameters. Training Set for Pgp Substrates from Li et al. (*Mol. Pharmaceutics* 2014, 11, 716-726).**

| Smoothing Factor | Tanimoto Distance | TP  | TN  | FP  | FN | Accuracy | Sensitivity | Specificity | kappa | Coverage |
|------------------|-------------------|-----|-----|-----|----|----------|-------------|-------------|-------|----------|
| HA               | 0.6               | 293 | 105 | 204 | 20 | 0.64     | 0.94        | 0.34        | 0.28  | 1.00     |
|                  | 0.6               | 279 | 118 | 191 | 34 | 0.64     | 0.89        | 0.38        | 0.27  | 1.00     |
|                  | 0.6               | 219 | 208 | 88  | 90 | 0.71     | 0.71        | 0.70        | 0.41  | 0.97     |
|                  | 0.6               | 183 | 163 | 61  | 60 | 0.74     | 0.75        | 0.73        | 0.48  | 0.75     |
|                  | 0.6               | 169 | 139 | 48  | 52 | 0.75     | 0.76        | 0.74        | 0.51  | 0.66     |
|                  | 0.6               | 163 | 124 | 42  | 45 | 0.77     | 0.78        | 0.75        | 0.53  | 0.60     |
|                  | 0.6               | 154 | 105 | 40  | 42 | 0.76     | 0.79        | 0.72        | 0.51  | 0.55     |
|                  | 0.6               | 144 | 90  | 36  | 38 | 0.76     | 0.79        | 0.71        | 0.50  | 0.50     |
|                  | 0.6               | 117 | 61  | 26  | 27 | 0.77     | 0.81        | 0.70        | 0.51  | 0.37     |
|                  | 0.6               | 99  | 27  | 13  | 13 | 0.83     | 0.88        | 0.68        | 0.56  | 0.24     |
| 0.6              | 0.20              | 47  | 6   | 2   | 1  | 0.95     | 0.98        | 0.75        | 0.77  | 0.09     |

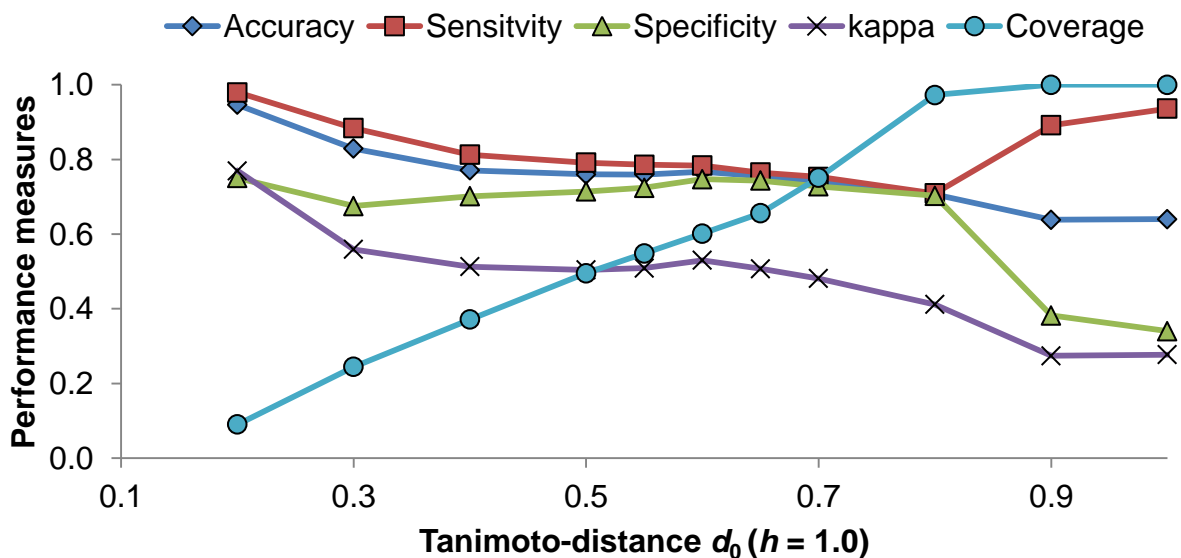

**Figure S1. Performance measures of the v-NN Pgp substrate model as a function of Tanimoto-distance threshold  $d_0$  at a constant smoothing factor  $h$  of 0.6.**

**Table S2. Optimizing the Smoothing Factor using 10-Fold Cross Validation for High Coverage (HC) Parameters. Training Set for Pgp Substrates from Li et al. (*Mol. Pharmaceutics* 2014, 11, 716-726)**

| Smoothing Factor | Tanimoto Distance | TP  | TN  | FP  | FN  | Accuracy | Sensitivity | Specificity | kappa | Coverage |
|------------------|-------------------|-----|-----|-----|-----|----------|-------------|-------------|-------|----------|
|                  | 1                 | 311 | 29  | 280 | 2   | 0.55     | 0.99        | 0.09        | 0.09  | 1.00     |
| 0.9              | 1                 | 309 | 46  | 263 | 4   | 0.57     | 0.99        | 0.15        | 0.14  | 1.00     |
| 0.8              | 1                 | 305 | 64  | 245 | 8   | 0.59     | 0.97        | 0.21        | 0.18  | 1.00     |
| 0.7              | 1                 | 301 | 84  | 225 | 12  | 0.62     | 0.96        | 0.27        | 0.23  | 1.00     |
| 0.6              | 1                 | 293 | 105 | 204 | 20  | 0.64     | 0.94        | 0.34        | 0.28  | 1.00     |
| 0.5              | 1                 | 281 | 132 | 177 | 32  | 0.66     | 0.90        | 0.43        | 0.33  | 1.00     |
| 0.4              | 1                 | 267 | 165 | 144 | 46  | 0.69     | 0.85        | 0.53        | 0.39  | 1.00     |
| 0.3              | 1                 | 243 | 200 | 109 | 70  | 0.71     | 0.78        | 0.65        | 0.42  | 1.00     |
| 0.2              | 1                 | 223 | 220 | 89  | 90  | 0.71     | 0.71        | 0.71        | 0.42  | 1.00     |
| 0.1              | 1                 | 206 | 222 | 87  | 107 | 0.69     | 0.66        | 0.72        | 0.38  | 1.00     |

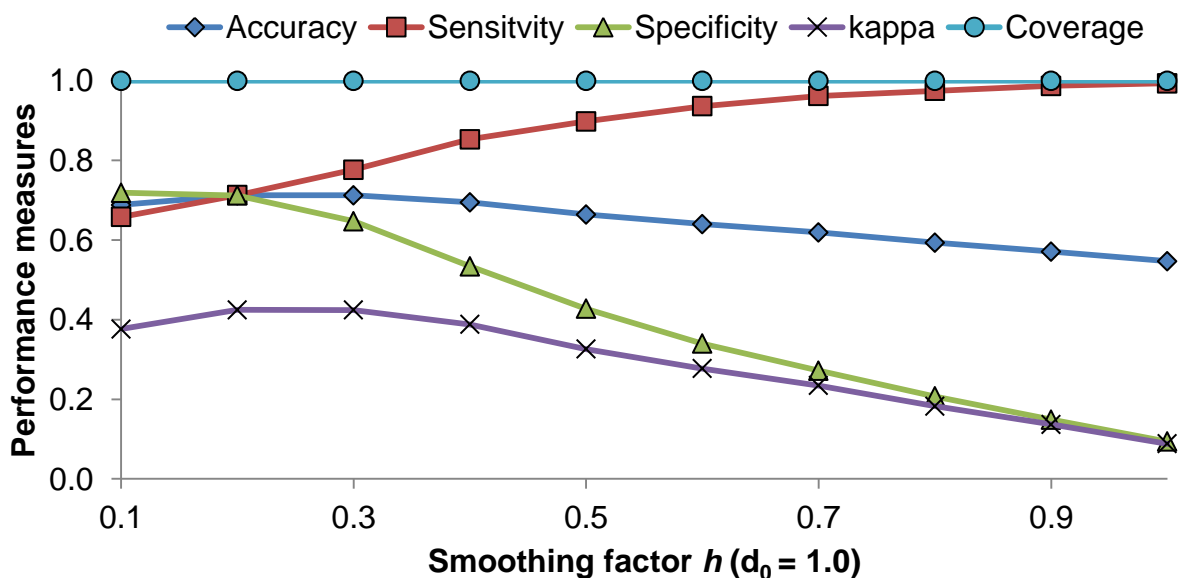

**Figure S2. Performance measures of the v-NN Pgp substrate model as a function of smoothing factor  $h$  at constant Tanimoto-distance threshold  $d_0$  of 1.0.**

**Table S3. Optimizing the  $d0$  Value using 10-Fold Cross Validation for High Coverage (HC) and High Accuracy (HA) Parameters. Training Set for Pgp inhibitors from Broccatelli et al. (*J. Med Chem.* 2011, 54, 1740)**

| Smoothing Factor | Tanimoto Distance | TP  | TN  | FP  | FN | Accuracy | Sensitivity | Specificity | kappa | Coverage |      |
|------------------|-------------------|-----|-----|-----|----|----------|-------------|-------------|-------|----------|------|
| HC               | 0.2               | 1   | 286 | 370 | 68 | 48       | 0.85        | 0.86        | 0.84  | 0.70     | 1.00 |
|                  | 0.2               | 0.9 | 286 | 369 | 68 | 48       | 0.85        | 0.86        | 0.84  | 0.70     | 1.00 |
|                  | 0.2               | 0.8 | 287 | 356 | 62 | 47       | 0.86        | 0.86        | 0.85  | 0.71     | 0.97 |
|                  | 0.2               | 0.7 | 272 | 270 | 43 | 36       | 0.87        | 0.88        | 0.86  | 0.75     | 0.80 |
| HA               | 0.2               | 0.6 | 254 | 215 | 28 | 20       | 0.91        | 0.93        | 0.88  | 0.81     | 0.67 |
|                  | 0.2               | 0.5 | 234 | 164 | 22 | 17       | 0.91        | 0.93        | 0.88  | 0.82     | 0.57 |
|                  | 0.2               | 0.4 | 218 | 100 | 19 | 15       | 0.90        | 0.94        | 0.84  | 0.78     | 0.46 |
|                  | 0.2               | 0.3 | 195 | 48  | 11 | 9        | 0.92        | 0.96        | 0.81  | 0.78     | 0.34 |
|                  | 0.2               | 0.2 | 136 | 14  | 3  | 1        | 0.97        | 0.99        | 0.82  | 0.86     | 0.20 |

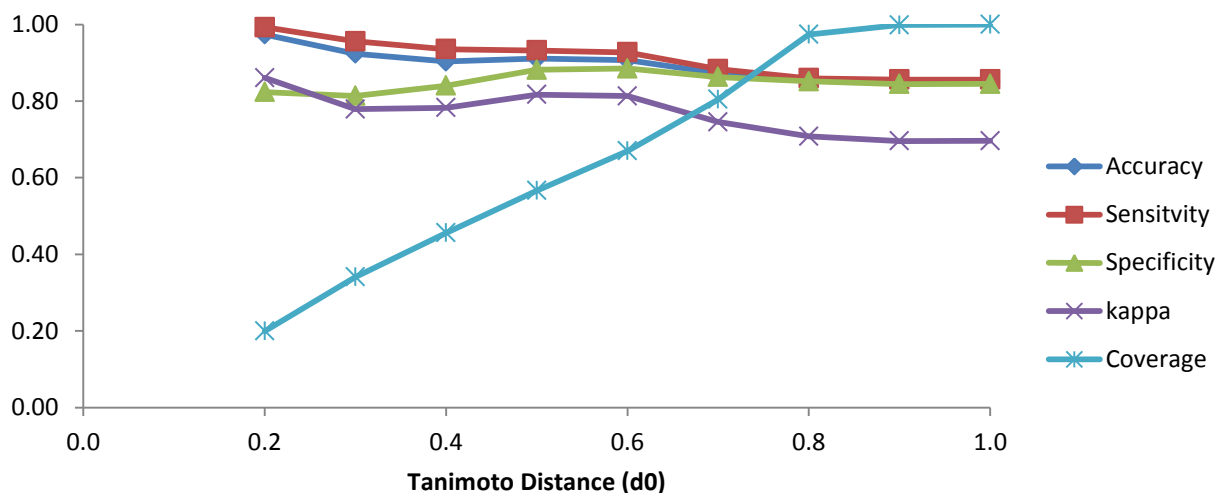

**Figure S3. Performance measures of the v-NN Pgp inhibitor model as a function of Tanimoto-distance threshold  $d0$  at a constant smoothing factor  $h$  of 0.6.**

**Table S4. Optimizing the  $d_0$  Value using Leave-One-Out (LOO) Cross Validation for High Accuracy (HA) Parameters. Training Set for Pgp from Chen et al. (*Mol. Pharmaceutics* 2011, 8, 889)**

| Smoothing factor | Tanimoto Distance | TP  | TN  | FP  | FN  | Accuracy | Sensitivity | Specificity | kappa | Coverage |
|------------------|-------------------|-----|-----|-----|-----|----------|-------------|-------------|-------|----------|
| HA               | 0.4               | 167 | 9   | 12  | 10  | 0.89     | 0.94        | 0.43        | 0.39  | 0.20     |
|                  | 0.4               | 292 | 38  | 40  | 16  | 0.85     | 0.95        | 0.49        | 0.49  | 0.39     |
|                  | 0.4               | 369 | 80  | 60  | 37  | 0.82     | 0.91        | 0.57        | 0.51  | 0.54     |
|                  | 0.4               | 436 | 127 | 76  | 41  | 0.83     | 0.91        | 0.63        | 0.57  | 0.68     |
|                  | 0.4               | 477 | 163 | 102 | 50  | 0.81     | 0.91        | 0.62        | 0.55  | 0.79     |
|                  | 0.4               | 524 | 195 | 139 | 51  | 0.79     | 0.91        | 0.58        | 0.52  | 0.91     |
|                  | 0.4               | 566 | 170 | 213 | 43  | 0.74     | 0.93        | 0.44        | 0.41  | 0.99     |
|                  | 0.4               | 606 | 43  | 349 | 3   | 0.65     | 1.00        | 0.11        | 0.12  | 1.00     |
|                  | 0.4               | 1   | 609 | 8   | 385 | 0        | 0.62        | 1.00        | 0.02  | 0.02     |

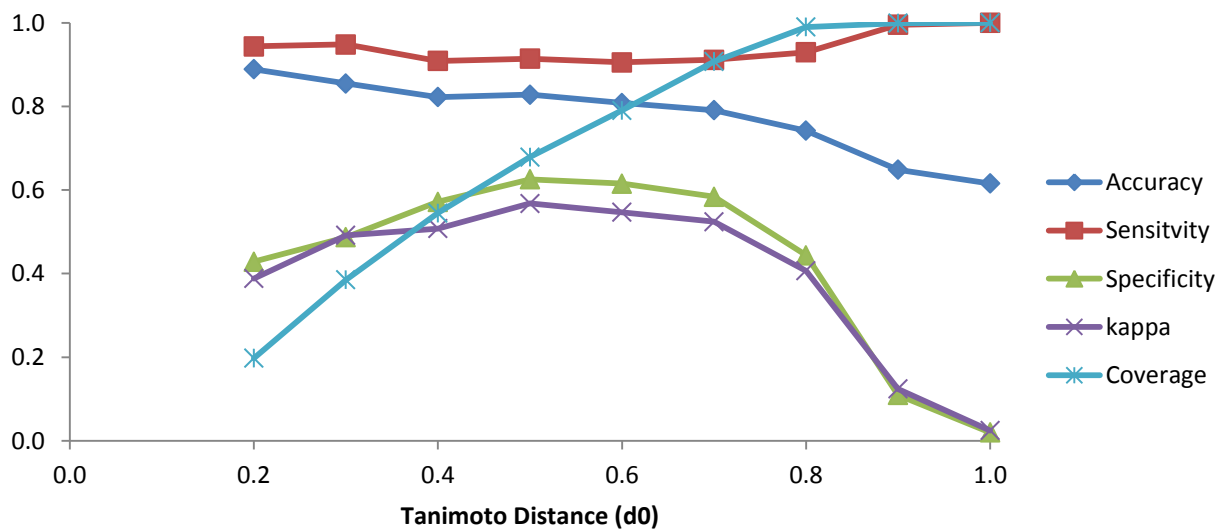

**Figure S4. Performance measures of the v-NN Pgp inhibitor model as a function of Tanimoto-distance threshold  $d_0$  at a constant smoothing factor  $h$  of 0.4.**

**Table S5. Optimizing the Smoothing Factor Value using Leave-One-Out (LOO) Cross Validation for High Coverage (HC) Parameters. Training Set for Pgp from Chen et al. (*Mol. Pharmaceutics* 2011, 8, 889)**

| Smoothing Factor | Tanimoto Distance | TP | TN  | FP  | FN  | Accuracy | Sensitivity | Specificity | kappa | Coverage |      |
|------------------|-------------------|----|-----|-----|-----|----------|-------------|-------------|-------|----------|------|
| HC               | 0.1               | 1  | 511 | 253 | 140 | 98       | 0.76        | 0.84        | 0.64  | 0.49     | 1.00 |
|                  | 0.2               | 1  | 533 | 228 | 165 | 76       | 0.76        | 0.88        | 0.58  | 0.47     | 1.00 |
|                  | 0.3               | 1  | 573 | 132 | 261 | 36       | 0.70        | 0.94        | 0.34  | 0.31     | 1.00 |
|                  | 0.4               | 1  | 609 | 8   | 385 | 0        | 0.62        | 1.00        | 0.02  | 0.02     | 1.00 |

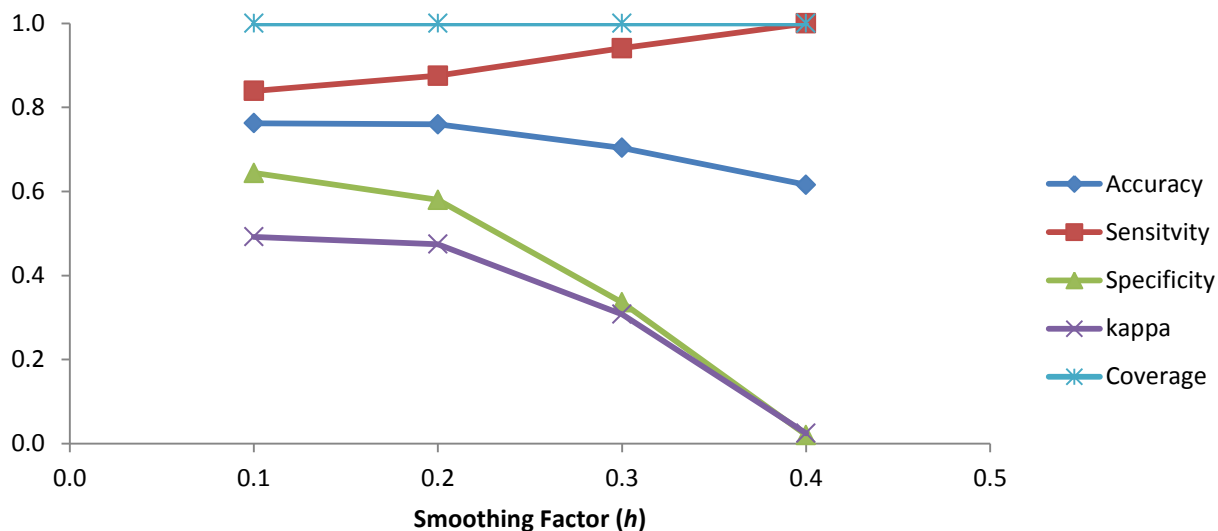

**Figure S5. Performance measures of the v-NN Pgp inhibitor model as a function of smoothing factor  $h$  at constant Tanimoto-distance threshold  $d0$  of 1.0.**

**Table S6. Optimizing the  $d_0$  Value using Leave-One-Out (LOO) Cross Validation for High Accuracy (HA) Parameters. Training Set for All Pgp Inhibitors**

| Smoothing Factor | Tanimoto Distance | TP   | TN  | FP  | FN  | Accuracy | Sensitivity | Specificity | kappa | Coverage |
|------------------|-------------------|------|-----|-----|-----|----------|-------------|-------------|-------|----------|
| HA               | 0.3               | 516  | 84  | 35  | 29  | 0.90     | 0.95        | 0.71        | 0.67  | 0.32     |
|                  | 0.3               | 764  | 164 | 67  | 52  | 0.89     | 0.94        | 0.71        | 0.66  | 0.51     |
|                  | 0.3               | 889  | 246 | 98  | 66  | 0.87     | 0.93        | 0.72        | 0.67  | 0.63     |
|                  | 0.3               | 984  | 348 | 125 | 75  | 0.87     | 0.93        | 0.74        | 0.68  | 0.75     |
|                  | 0.3               | 1040 | 424 | 159 | 90  | 0.85     | 0.92        | 0.73        | 0.67  | 0.83     |
|                  | 0.3               | 1086 | 499 | 214 | 106 | 0.83     | 0.91        | 0.70        | 0.63  | 0.93     |
|                  | 0.3               | 1125 | 541 | 286 | 94  | 0.81     | 0.92        | 0.65        | 0.60  | 1.00     |
|                  | 0.3               | 1162 | 402 | 435 | 57  | 0.76     | 0.95        | 0.48        | 0.47  | 1.00     |
|                  | 0.3               | 1167 | 341 | 496 | 52  | 0.73     | 0.96        | 0.41        | 0.40  | 1.00     |

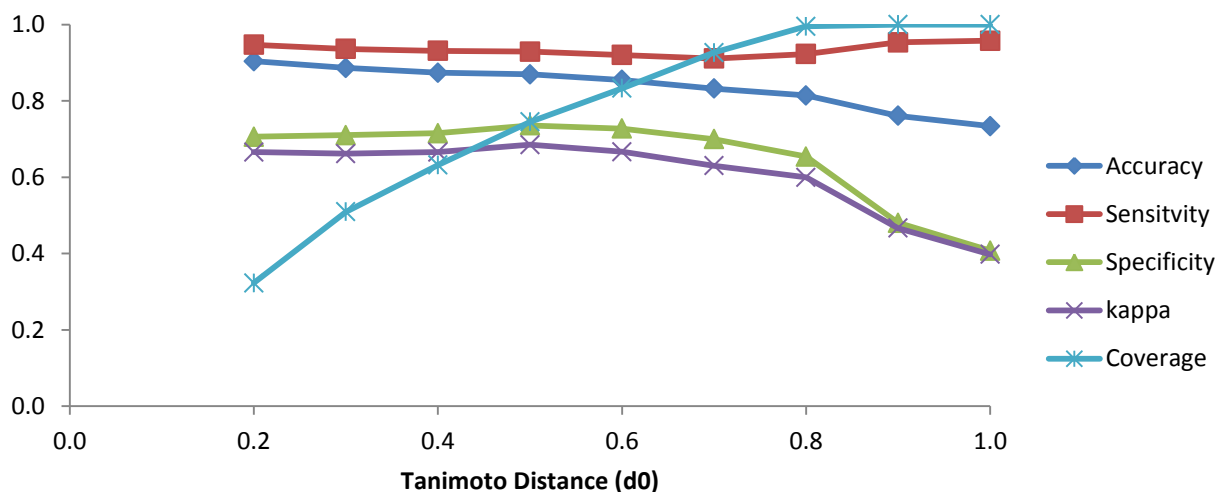

**Figure S6. Performance measures of the v-NN Pgp inhibitor model as a function of Tanimoto-distance threshold  $d_0$  at a constant smoothing factor  $h$  of 0.3.**



**Table S7. Optimizing the Smoothing Factor Value using Leave-One-Out (LOO) Cross Validation for High Coverage (HC) Parameters. Training Set All Pgp Inhibitors.**

| Smoothing Factor | Tanimoto Distance | TP   | TN  | FP  | FN  | Accuracy | Sensitivity | Specificity | kappa | Coverage |
|------------------|-------------------|------|-----|-----|-----|----------|-------------|-------------|-------|----------|
| 0.1              | 1                 | 1065 | 643 | 194 | 154 | 0.83     | 0.87        | 0.77        | 0.65  | 1.00     |
| 0.2              | 1                 | 1101 | 589 | 248 | 118 | 0.82     | 0.90        | 0.70        | 0.62  | 1.00     |
| 0.3              | 1                 | 1167 | 341 | 496 | 52  | 0.73     | 0.96        | 0.41        | 0.40  | 1.00     |

**Table S8. Performance Measures of the Pgp Substrate Model Using Different Fingerprints.**

| Data                      | Fingerprints | Smoothing Factor | Tanimoto Distance | Accuracy | Sensitivity | Specificity | kappa | Coverage |
|---------------------------|--------------|------------------|-------------------|----------|-------------|-------------|-------|----------|
| High Coverage Predictions |              |                  |                   |          |             |             |       |          |
| Training                  | FCFP4        | 0.3              | 1                 | 0.73     | 0.77        | 0.69        | 0.46  | 100%     |
|                           | MDLKeys      | 0.2              | 1                 | 0.74     | 0.88        | 0.60        | 0.47  | 100%     |
|                           | ECFP4        | 0.3              | 1                 | 0.72     | 0.78        | 0.65        | 0.43  | 100%     |
| Test                      | FCFP4        | 0.3              | 1                 | 0.78     | 0.84        | 0.69        | 0.54  | 100%     |
|                           | MDLKeys      | 0.2              | 1                 | 0.75     | 0.85        | 0.62        | 0.48  | 100%     |
|                           | ECFP4        | 0.3              | 1                 | 0.76     | 0.80        | 0.71        | 0.51  | 100%     |
| High Accuracy Predictions |              |                  |                   |          |             |             |       |          |
| Training                  | FCFP4        | 0.6              | 0.50              | 0.76     | 0.77        | 0.74        | 0.51  | 62%      |
|                           | MDLKeys      | 0.2              | 0.25              | 0.77     | 0.81        | 0.72        | 0.52  | 63%      |
|                           | ECFP4        | 0.6              | 0.60              | 0.77     | 0.78        | 0.75        | 0.53  | 60%      |
| Test                      | FCFP4        | 0.6              | 0.50              | 0.82     | 0.85        | 0.79        | 0.64  | 71%      |
|                           | MDLKeys      | 0.2              | 0.25              | 0.80     | 0.87        | 0.72        | 0.59  | 72%      |
|                           | ECFP4        | 0.6              | 0.60              | 0.81     | 0.82        | 0.78        | 0.60  | 70%      |

**Table S9. Performance Measures of the Pgp Inhibitor Model Using Different Fingerprints.**

| Data                      | Fingerprints | Smoothing Factor | Tanimoto Distance | Accuracy | Sensitivity | Specificity | kappa | Coverage |
|---------------------------|--------------|------------------|-------------------|----------|-------------|-------------|-------|----------|
| High Coverage Predictions |              |                  |                   |          |             |             |       |          |
| Broccatelli               |              |                  |                   |          |             |             |       |          |
| Training                  | FCFP4        | 0.2              | 1                 | 0.86     | 0.87        | 0.85        | 0.72  | 100%     |
|                           | MDLKeys      | 0.1              | 1                 | 0.85     | 0.89        | 0.82        | 0.69  | 100%     |
|                           | ECFP4        | 0.2              | 1                 | 0.85     | 0.86        | 0.84        | 0.69  | 100%     |
| Ext. Test                 | FCFP4        | 0.2              | 1                 | 0.79     | 0.89        | 0.60        | 0.52  | 100%     |
|                           | MDLKeys      | 0.1              | 1                 | 0.81     | 0.92        | 0.59        | 0.55  | 100%     |
|                           | ECFP4        | 0.2              | 1                 | 0.76     | 0.81        | 0.67        | 0.48  | 100%     |
| Internal                  |              |                  |                   |          |             |             |       |          |
| Test                      | FCFP4        | 0.2              | 1                 | 0.86     | 0.89        | 0.83        | 0.72  | 100%     |
|                           | MDLKeys      | 0.1              | 1                 | 0.86     | 0.89        | 0.83        | 0.72  | 100%     |
|                           | ECFP4        | 0.2              | 1                 | 0.84     | 0.84        | 0.83        | 0.67  | 100%     |
| Chen                      |              |                  |                   |          |             |             |       |          |
| Training                  | FCFP4        | 0.1              | 1                 | 0.78     | 0.86        | 0.66        | 0.53  | 100%     |
|                           | MDLKeys      | 0.1              | 1                 | 0.75     | 0.86        | 0.56        | 0.45  | 100%     |
|                           | ECFP4        | 0.1              | 1                 | 0.76     | 0.84        | 0.64        | 0.50  | 100%     |
| Chen Test                 | FCFP4        | 0.1              | 1                 | 0.78     | 0.87        | 0.63        | 0.51  | 100%     |
|                           | MDLKeys      | 0.1              | 1                 | 0.75     | 0.85        | 0.59        | 0.45  | 100%     |
|                           | ECFP4        | 0.1              | 1                 | 0.76     | 0.87        | 0.59        | 0.48  | 100%     |
| High Accuracy Predictions |              |                  |                   |          |             |             |       |          |
| Broccatelli               |              |                  |                   |          |             |             |       |          |
| Training                  | FCFP4        | 0.2              | 0.50              | 0.89     | 0.91        | 0.87        | 0.78  | 68%      |
|                           | MDLKeys      | 0.1              | 0.25              | 0.90     | 0.93        | 0.85        | 0.79  | 69%      |
|                           | ECFP4        | 0.2              | 0.60              | 0.91     | 0.93        | 0.88        | 0.81  | 67%      |
| Ext. Test                 | FCFP4        | 0.2              | 0.50              | 0.86     | 0.92        | 0.70        | 0.65  | 55%      |
|                           | MDLKeys      | 0.1              | 0.25              | 0.83     | 0.93        | 0.59        | 0.56  | 58%      |
|                           | ECFP4        | 0.2              | 0.60              | 0.88     | 0.91        | 0.80        | 0.71  | 53%      |
| Internal                  |              |                  |                   |          |             |             |       |          |
| Test                      | FCFP4        | 0.2              | 0.50              | 0.89     | 0.91        | 0.86        | 0.77  | 64%      |
|                           | MDLKeys      | 0.1              | 0.25              | 0.91     | 0.97        | 0.81        | 0.80  | 64%      |
|                           | ECFP4        | 0.2              | 0.60              | 0.89     | 0.88        | 0.91        | 0.78  | 66%      |
| Chen                      |              |                  |                   |          |             |             |       |          |
| Training                  | FCFP4        | 0.1              | 0.4               | 0.83     | 0.90        | 0.66        | 0.58  | 69%      |
|                           | MDLKeys      | 0.1              | 0.2               | 0.79     | 0.88        | 0.57        | 0.48  | 71%      |
|                           | ECFP4        | 0.6              | 0.5               | 0.83     | 0.91        | 0.64        | 0.58  | 68%      |
| Chen Test                 | FCFP4        | 0.1              | 0.4               | 0.82     | 0.90        | 0.62        | 0.53  | 72%      |
|                           | MDLKeys      | 0.1              | 0.2               | 0.78     | 0.86        | 0.59        | 0.45  | 73%      |
|                           | ECFP4        | 0.6              | 0.5               | 0.79     | 0.90        | 0.50        | 0.43  | 72%      |
